# Supplementary material for: A ZnO/porous GaN heterojunction and its application as a humidity sensor
Source: Royal Society of Chemistry journal article supplement (doi:10.1039/c8na00243f), 2018-12-21
Supplement: c8na00243f1.pdf [file c8na00243f1.pdf]

## Electronic Supplementary Information

### ZnO/Porous GaN Heterojunction and its Application as Humidity Sensor

Chao Wang<sup>a,b</sup>, Hui Huang<sup>a,b</sup>, Miao-Rong Zhang<sup>a</sup>, Wei-Xing Song<sup>\*c</sup>, Long Zhang<sup>a</sup>, Rui Xi<sup>a</sup>, Lu-Jia Wang<sup>a</sup>,  
Ge-Bo Pan<sup>\*a</sup>

<sup>a</sup> Division of Interdisciplinary Research, Suzhou Institute of Nano-Tech and Nano-Bionics, Chinese Academy of Sciences, 215123 Suzhou, P. R. China

<sup>b</sup> School of Nano Technology and Nano Bionics, University of Science and Technology of China, 230026 Hefei, P. R. China

<sup>c</sup> Department of Chemistry, Capital Normal University, 100048 Beijing, P. R. China

---

\* Corresponding authors.

*E-mail addresses:* songwx@cnu.edu.cn (W.-X. Song), gbpan2008@sinano.ac.cn (G.-B. Pan).

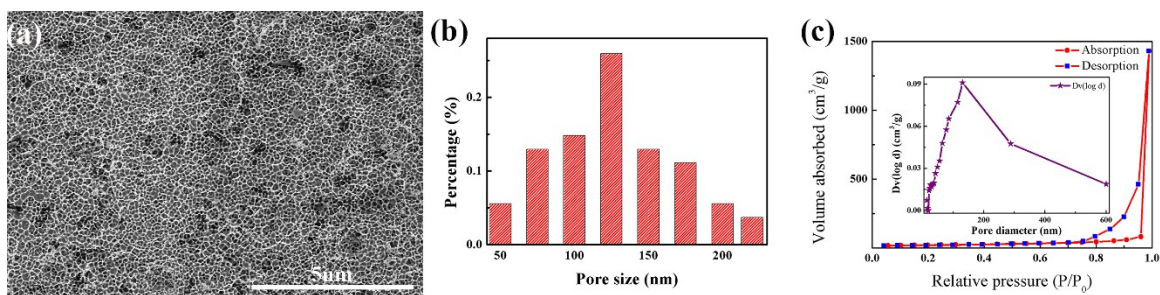

**Fig. S1** (a) SEM images of PGAN. (b) Pore size distribution histograms of PGAN. (c) N<sub>2</sub> adsorption-desorption isotherm curve and pore size distribution (inset) of PGAN.
